# Supplementary material for: Color-tunable luminescent CdTe quantum dot membranes based on bacterial cellulose (BC) and application in ion detection
Source: Royal Society of Chemistry journal article supplement (doi:10.1039/c5ra08361c), 2015-01-01
Supplement: c5ra08361c1.pdf [file c5ra08361c1.pdf]

## Supporting information

### Color-tunable luminescent CdTe quantum dots membranes based on bacterial cellulose (BC) and application in ion detection

Yan Ge, Shiyan Chen,\* Jingxuan Yang, Biao Wang, Huaping Wang\*

State Key Laboratory for Modification of Chemical Fibers and Polymer Materials,  
Key Laboratory of High Performance Fibers and Products (Ministry of Education),  
College of Materials Science and Engineering, Donghua University, Shanghai,  
201620, PR China

Email: [chensy@dhu.edu.cn](mailto:chensy@dhu.edu.cn), [wanghp@dhu.edu.cn](mailto:wanghp@dhu.edu.cn)

Tel: +862167792950

Fax: +862167792958

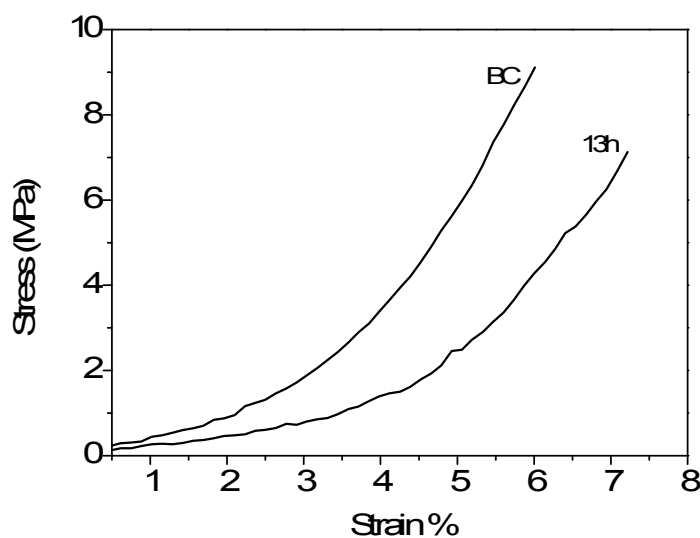

Fig. S1 Tensile stress-strain behaviors of pure BC and CdTe/BC nanocomposites (13 h).

Some BC substrates sized 2cm × 8cm were prepared for mechanical measurements.

The mechanical properties of samples were measured using a WDT Universal Testing Machine at room temperature and a crosshead speed of 20 mm/min.

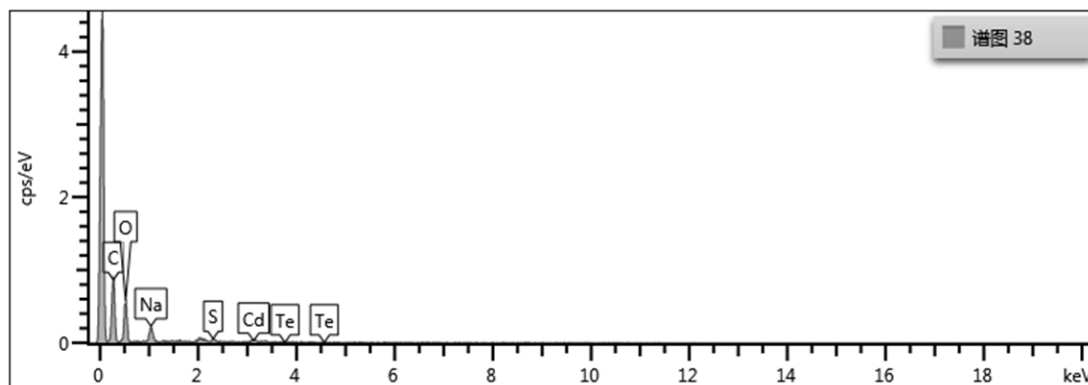

Fig. S2 EDX spectra for CdTe/BC nanocomposite.

Table S1 Results of EDX analysis for CdTe/BC nanocomposite.

| Element | Wt%    | Atom%  |
|---------|--------|--------|
| C       | 54.63  | 64.64  |
| O       | 35.75  | 31.76  |
| Na      | 4.24   | 2.62   |
| S       | 1.00   | 0.44   |
| Cd      | 3.68   | 0.47   |
| Te      | 0.70   | 0.08   |
| Total:  | 100.00 | 100.00 |

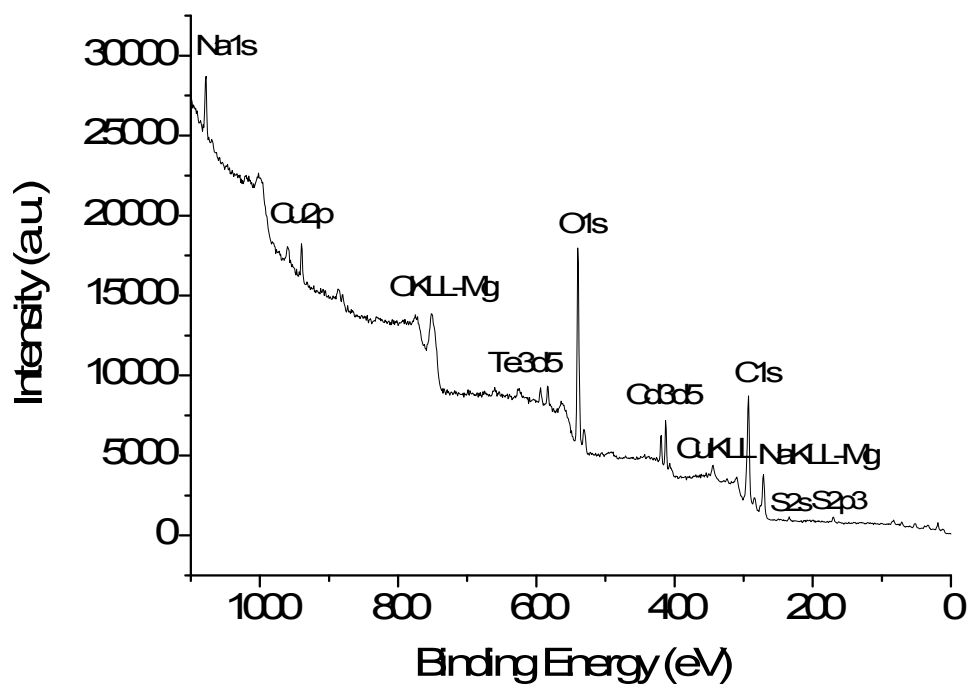

Fig. S3 XPS spectrum for green luminescent membrane after treatment with  $\text{Cu}^{2+}$  (1mM)
